# Supplementary material
Source: publisher site journal article supplement (https://www.dovepress.com/article/359025)
Supplement: Supplementary file 1 [file get_supplementary_file.php]

Supplementary Table S-1. List of All Model Inputs for the ALS Case Study Model

|  | Input Value | Sources |
| --- | --- | --- |
| **Inputs for estimating IV administration costs** | | |
| Distribution of patients across different sites of IV administration | Home infusion: 43%  Physician office: 32%  Hospital: 26% | Jackson et al (2019) |
| Number of administrations per year | 134.4 | Radicava prescribing information, 2018 |
| Cost of each administration | Home infusion: $0; Office: $148.33 | Centers for Medicare and Medicaid Services, 2020 |
| One-time cost of home IV administration training | Home infusion: $162.15 | Washington State Department of Labor and Industries, 2019 |
| **Inputs for estimating IV maintenance costs** | | |
| Distribution of patients across different methods of IV administration | Peripheral line: 18.4%  PICC line: 21.4%  Implantable port: 60.2% | Jackson et al (2019) |
| Cost of each insertion | Peripheral line: $174.67  PICC line: $486.85  Implantable port: $1,218.02 | Centers for Medicare and Medicaid Services, 2020 |
| Number of insertions | Peripheral line: 27.1 (year 1), 26.1 (year 2+)  PICC line: 2 (year 1+)  Implantable port:1 (year 1), 0 (year 2+) | Assumption based on Cheung et al, 2009 |
| Cost of IV removals | Annual number of removals: 13 only for peripheral line (0 for other methods)  Cost per removal $76.15 | Unit cost: Centers for Medicare and Medicaid Services, 2020; number of removals: assumption |
| **Inputs for estimating costs of adverse events** | | |
| Injection-site infection | 0.55%, $23,725.28 per case | Incidence: Genge et al, 2020; cost per case: Agency for Healthcare Research and Quality, 2020 |
| Pulmonary embolism | 0.37%, $10,584.80 per case |
| Deep vein thrombosis | 0.37%, $10,420.81 per case |
| **Inputs for estimating indirect costs** | | |
| Time lost for IV administration | Home: 1 hour for each patient and caregiver  Office/hospital: 3.1 hour for each patient and caregiver | 1 hour based on the time required for Radicava infusion (Radicava prescribing information, 2018); 3.1 hours based on a previous publication on time to travel (1 hour- Jensen et al, 2016) plus 1 hour for the insertion procedure (Mayo Clinic, 2020) plus 1.1 hours for wait time for the procedure (Kallen et al, 2012)  Patients with port lines are assumed to lose 1 full day for rest and recovery (University Health Network, 2020; University of Washington Medicine, 2020) |
| Time lost for each IV insertion visit | Peripheral and PICC line: 3.1 hours for each patient and caregiver  Port: 8 hours for each patient and caregiver |
| Wage lost | Percentage of patients and caregivers who are employed: 15%  Hourly wage: $27.04 | Employment rate for ALS patients: Mehta et al, 2014, assumption for a similar employment rate for caregivers  Wage: The average wage amoung the general population in the age group of typical ALS patients (United States Bureau of Labor Statistics, 2020) |

**Abbreviations:** ALS, amyotrophic lateral sclerosis;IV, intravenous; PICC, peripherally inserted central catheter.

# Supplementary References

Agency for Healthcare Research and Quality. HCUPnet: Healthcare Cost and Utilization Project. 2020. Available at: https://hcupnet.ahrq.gov/#setup. Accessed May 20, 2020.

Centers for Medicare and Medicaid Services. Physician fee schedule look-up. April 3, 2020a. Available at: https://www.cms.gov/apps/physician-fee-schedule/overview.aspx. Accessed May 20, 2020.

Cheung E, Baerlocher MO, Asch M, Myers A. Venous access: a practical review for 2009. Can Fam Physician. 2009 May 1;55(5):494-6.

Genge, A, Brooks BR, Osakarsson B, Kalin A, Ji M, Agnese W, et al. Analysis of the US safety data for Radicava® (edaravone): findings from postmarketing pharmacovigilance during the first year after launch. Manuscript submitted for publication.

Jackson C, Heiman-Patterson T, Kittrell P, Baranovsky T, McAnanama G, Bower L, et al. Radicava (edaravone) for amyotrophic lateral sclerosis: US experience at 1 year after launch. Amyotroph Lateral Scler Frontotemporal Degener. 2019 Oct 2;20(7-8):605-10.

Jensen IS, Zacherle E, Blanchette CM, Zhang J, Yin W. Evaluating cost benefits of combination therapies for advanced melanoma. Drugs Context. 2016;5.

Kallen MA, Terrell JA, Lewis-Patterson P, Hwang JP. Improving wait time for chemotherapy in an outpatient clinic at a comprehensive cancer center. J Oncol Pract. 2012 Jan;8(1):e1-7.

Mayo Clinic. Peripherally inserted central catheter (PICC) line. 2020. Available at: https://www.mayoclinic.org/tests-procedures/picc-line/about/pac-20468748. Accessed May 20, 2020.

RADICAVA prescribing information. Jersey City, NJ: MT Pharma America, Inc; 2018.

University Health Network. What to expect when getting an implanted port. 2020. Available at: https://www.uhn.ca/PatientsFamilies/Health_Information/Health_Topics/Documents/What_to_Expect_When_Getting_Port-a-Cath.pdf. Accessed May 20, 2020.

University of Washington Medicine. Angiography: chest port. 2020. Available at: https://www.uwmedicine.org/sites/default/files/2018-10/181019_Radiology_Preps_Angiography-Chest-Port.pdf. Accessed May 20, 2020.

US Bureau of Labor Statistics (BLS). Databases, Tables & Calculators by Subject: CPI for All Urban Consumers (CPI-U). Series Title: Medical care in US city average, all urban consumers, not seasonally adjusted; 2019. Available at: https://data.bls.gov/timeseries/CUUR0000SAM?output_view=data. Accessed July 1, 2019.

Washington State Department of Labor and Industries. Patient Care. Fee Schedule Lookup. Year 2019. Available at: https://lni.wa.gov/patient-care/billing-payments/fee-schedules-and-payment-policies/fee-schedule#/. Accessed May 20, 2020.
